# Supplementary material for: Gene Expression Comparison between the Lymph Node-Positive and -Negative Reveals a Peculiar Immune Microenvironment Signature and a Theranostic Role for WNT Targeting in Pancreatic Ductal Adenocarcinoma: A Pilot Study
Source: Cancers (Basel). 2019 Jul 4;11(7):942. doi: 10.3390/cancers11070942 (PMC6678707; doi:10.3390/cancers11070942)
Supplement: Supplementary file 1 [file cancers-11-00942-s001.pdf]

|    | GOTerm                                                                                   | % Associated Genes | P Value  |
|----|------------------------------------------------------------------------------------------|--------------------|----------|
| 1  | organ induction                                                                          | 8.33               | 0.003    |
| 2  | regulation of epithelial tube formation                                                  | 9.09               | 0.003    |
| 3  | cell proliferation in midbrain                                                           | 18.18              | 7.49E-4  |
| 4  | positive regulation of catecholamine secretion                                           | 16.66              | 8.96E-4  |
| 5  | morphogenesis of an epithelial bud                                                       | 15                 | 5.53E-5  |
| 6  | hepatocyte differentiation                                                               | 13.04              | 8.52E-5  |
| 7  | primary lung bud formation                                                               | 40                 | 1.38E-4  |
| 8  | midbrain dopaminergic neuron differentiation                                             | 13.63              | 7.43E-5  |
| 9  | Wnt signaling pathway involved in midbrain dopaminergic neuron differentiation           | 14.28              | 0.001    |
| 10 | canonical Wnt signaling pathway involved in midbrain dopaminergic neuron differentiation | 33.33              | 2.06E-4  |
| 11 | neurological system process involved in regulation of systemic arterial blood pressure   | 11.11              | 0.002    |
| 12 | negative regulation of systemic arterial blood pressure                                  | 10.52              | 0.002    |
| 13 | cardiac chamber formation                                                                | 16.66              | 8.96E-4  |
| 14 | adult heart development                                                                  | 12.5               | 0.001    |
| 15 | negative regulation of bone resorption                                                   | 14.28              | 0.001    |
| 16 | regulation of systemic arterial blood pressure by baroreceptor feedback                  | 40                 | 1.38E-4  |
| 17 | regulation of systemic arterial blood pressure by carotid sinus baroreceptor feedback    | 66.66              | 4.16E-5  |
| 18 | cardiac ventricle formation                                                              | 20                 | 6.14E-4  |
| 19 | negative regulation of myotube differentiation                                           | 9.09               | 0.003    |
| 20 | cardiac right ventricle morphogenesis                                                    | 8.33               | 0.003    |
| 21 | cardiac myofibril assembly                                                               | 8.33               | 0.003    |
| 22 | baroreceptor response to increased systemic arterial blood pressure                      | 66.66              | 4.16E-5  |
| 23 | negative regulation of TCF-dependent signaling by WNT ligand antagonists                 | 13.33              | 0.001    |
| 24 | VLDL assembly                                                                            | 40                 | 1.38E-4  |
| 25 | activation of protein kinase C activity                                                  | 50                 | 8.31E-5  |
| 26 | neurological system process involved in regulation of systemic arterial blood pressure   | 11.11              | 0.002    |
| 27 | positive regulation of keratinocyte proliferation                                        | 9.09               | 0.003    |
| 28 | very-low-density lipoprotein particle assembly                                           | 9.09               | 0.003    |
| 29 | regulation of response to food                                                           | 9.52               | 0.002    |
| 30 | organ induction                                                                          | 8.33               | 0.003    |
| 31 | negative regulation of systemic arterial blood pressure                                  | 10.52              | 0.002    |
| 32 | negative regulation of response to food                                                  | 14.28              | 0.001    |
| 33 | negative regulation of response to nutrient levels                                       | 10                 | 0.002    |
| 34 | negative regulation of keratinocyte differentiation                                      | 10                 | 0.002    |
| 35 | negative regulation of bone resorption                                                   | 14.28              | 0.001    |
| 36 | prostate glandular acinus development                                                    | 14.28              | 0.001    |
| 37 | regulation of intestinal lipid absorption                                                | 22.22              | 4.92E-4  |
| 38 | regulation of epithelial tube formation                                                  | 9.09               | 0.003    |
| 39 | regulation of systemic arterial blood pressure by baroreceptor feedback                  | 40                 | 1.38E-4  |
| 40 | negative regulation of appetite                                                          | 14.28              | 0.001    |
| 41 | positive regulation of catecholamine secretion                                           | 16.66              | 8.96E-4  |
| 42 | lipoprotein transport                                                                    | 8.69               | 0.003    |
| 43 | regulation of fibroblast apoptotic process                                               | 11.11              | 0.002    |
| 44 | regulation of systemic arterial blood pressure by carotid sinus baroreceptor feedback    | 66.66              | 4.16E-5  |
| 45 | regulation of intestinal cholesterol absorption                                          | 22.22              | 4.928E-4 |
| 46 | positive regulation of fibroblast apoptotic process                                      | 18.18              | 7.49E-4  |
| 47 | glucagon secretion                                                                       | 14.28              | 0.001    |
| 48 | regulation of glucagon secretion                                                         | 15.38              | 0.001    |
| 49 | positive regulation of non-canonical Wnt signaling pathway                               | 12.5               | 0.001    |
| 50 | baroreceptor response to increased systemic arterial blood pressure                      | 66.66              | 4.167E-5 |
| 51 | Cdc42 protein signal transduction                                                        | 11.11              | 0.002    |

|     |                                                                       |          |          |
|-----|-----------------------------------------------------------------------|----------|----------|
| 52  | negative regulation of glucagon secretion                             | 40       | 1.382E-4 |
| 53  | regulation of Wnt signaling pathway, planar cell polarity pathway     | 11.11    | 0.002    |
| 54  | regulation of Cdc42 protein signal transduction                       | 15.38    | 0.001    |
| 55  | negative regulation of osteoclast differentiation                     | 12.5     | 6.07E-6  |
| 56  | fat digestion and absorption                                          | 14.63    | 9.155E-9 |
| 57  | vitamin digestion and absorption                                      | 8.33     | 0.003    |
| 58  | scavenging of heme from plasma                                        | 23.07    | 1.41E-5  |
| 59  | binding and Uptake of Ligands by Scavenger Receptors                  | 9.52     | 1.836E-5 |
| 60  | scavenging by Class B Receptors                                       | 33.33    | 2.068E-4 |
| 61  | scavenging by Class A Receptors                                       | 10.52    | 0.002    |
| 62  | VLDL assembly                                                         | 40       | 1.382E-4 |
| 63  | chylomicron assembly                                                  | 16.66    | 3.983E-5 |
| 64  | plasma lipoprotein assembly                                           | 16.66    | 3.983E-5 |
| 65  | plasma lipoprotein remodeling                                         | 10       | 1.918E-4 |
| 66  | chylomicron remodeling                                                | 22.22    | 4.928E-4 |
| 67  | HDL remodeling                                                        | 20       | 6.14E-4  |
| 68  | activation of protein kinase C activity                               | 50       | 8.31E-5  |
| 69  | triglyceride-rich lipoprotein particle remodeling                     | 11.76    | 0.001    |
| 70  | high-density lipoprotein particle remodeling                          | 9.09     | 0.003    |
| 71  | chylomicron assembly                                                  | 33.33    | 4.2E-6   |
| 72  | very-low-density lipoprotein particle assembly                        | 9.09     | 0.003    |
| 73  | regulation of response to food                                        | 9.52     | 0.002    |
| 74  | negative regulation of response to food                               | 14.28    | 0.001    |
| 75  | negative regulation of response to nutrient levels                    | 10       | 0.002    |
| 76  | cell-cell adhesion involved in gastrulation                           | 13.33    | 0.001    |
| 77  | regulation of cell-cell adhesion involved in gastrulation             | 14.28    | 0.001    |
| 78  | regulation of intestinal lipid absorption                             | 22.22    | 4.92E-4  |
| 79  | intestinal cholesterol absorption                                     | 15       | 5.53E-5  |
| 80  | negative regulation of appetite                                       | 14.28    | 0.001    |
| 81  | chylomicron remodeling                                                | 15.38    | 0.001    |
| 82  | lipoprotein transport                                                 | 8.695652 | 0.003    |
| 83  | regulation of intestinal cholesterol absorption                       | 22.22    | 4.92E-4  |
| 84  | negative regulation of heterotypic cell-cell adhesion                 | 14.28    | 0.001    |
| 85  | negative regulation of B cell proliferation                           | 8        | 0.003    |
| 86  | glucagon secretion                                                    | 14.28    | 0.001    |
| 87  | regulation of glucagon secretion                                      | 15.38    | 0.001    |
| 88  | positive regulation of non-canonical Wnt signaling pathway            | 12.5     | 0.001    |
| 89  | regulation of cytokine secretion involved in immune response          | 8.69     | 0.003    |
| 90  | Cdc42 protein signal transduction                                     | 15.38    | 0.001    |
| 91  | negative regulation of glucagon secretion                             | 40       | 1.38E-4  |
| 92  | regulation of Wnt signaling pathway, planar cell polarity pathway     | 11.11    | 0.002    |
| 93  | negative regulation of cytokine secretion involved in immune response | 8.69     | 0.003    |
| 94  | regulation of Cdc42 protein signal transduction                       | 15.38    | 0.001    |
| 95  | negative regulation of calcium ion transport into cytosol             | 11.11    | 1.39E-4  |
| 96  | detection of light stimulus involved in visual perception             | 11.11    | 0.002    |
| 97  | regulation of the force of heart contraction                          | 8.88     | 2.42E-5  |
| 98  | the canonical retinoid cycle in rods (twilight vision)                | 13.04    | 8.52E-5  |
| 99  | myosin filament assembly                                              | 14.28    | 0.001    |
| 100 | striated muscle myosin thick filament assembly                        | 15.38    | 0.001    |

**File S1:** List of significant terms and the related genes involved in the KEGG, GO Biological Process, Reactome pathway and GO immune system process databases network enrichment showed in Figure 3 (a) and (b).

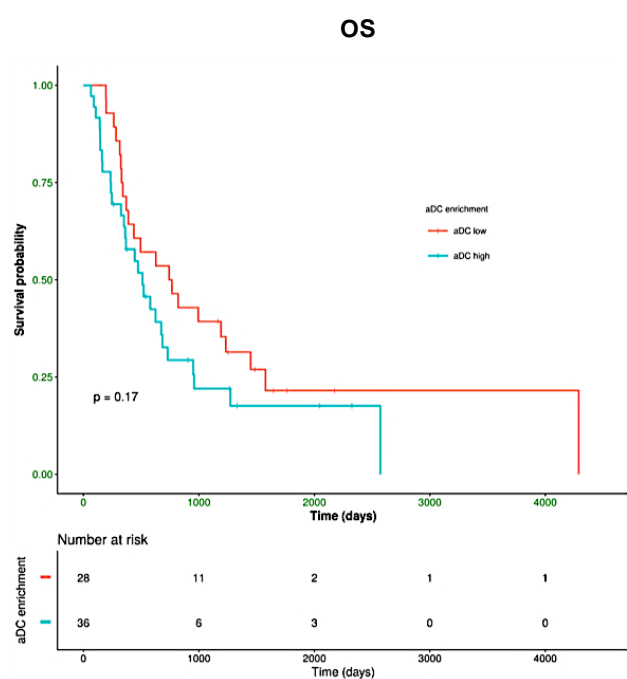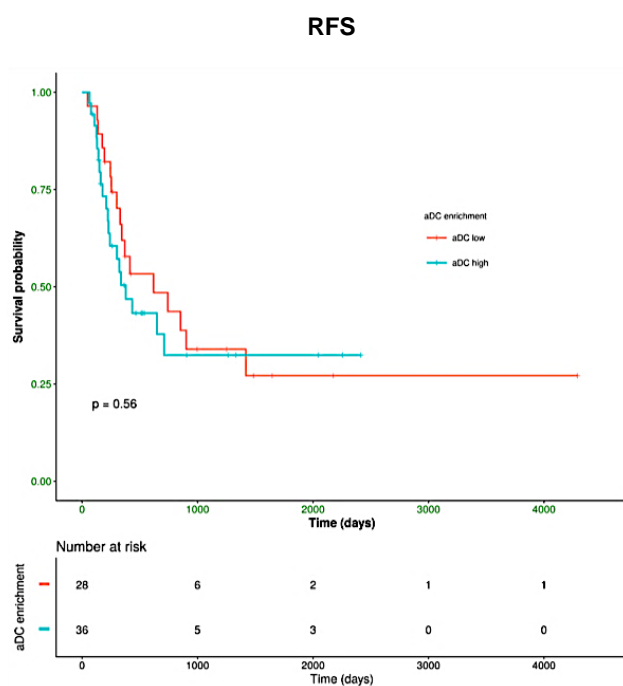

**Supplementary Figure 1.** Survival curves for OS (left panel) and RFS (right panel) comparing  $N^{\text{pos}}$  patients stratified according to aDC enrichments.

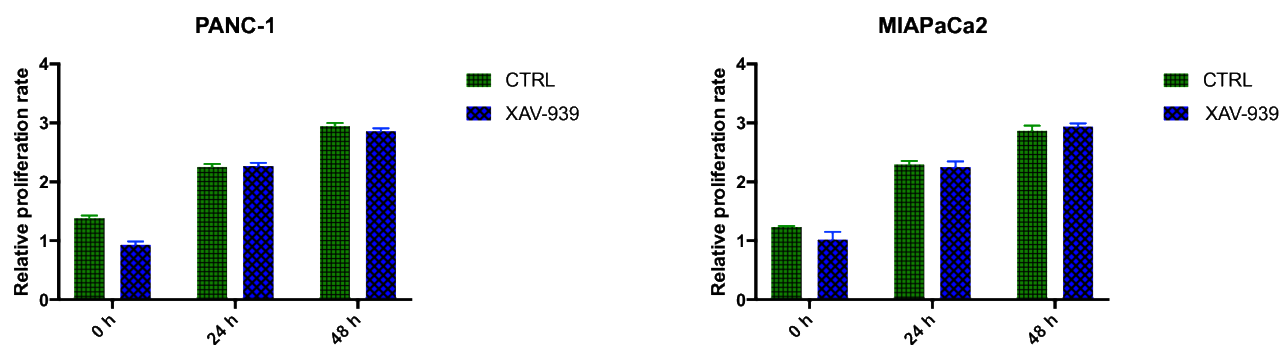

**Supplementary Figure 2.** The proliferation of PANC-1 and MIAPaCa-2 after XAV-939 treatment was evaluated by MTT assay at 0, 24, 48 h. Bars represent the mean  $\pm$  SD, n = 5.

|           | Total cohort patients<br>(n=176) |                                    |
|-----------|----------------------------------|------------------------------------|
| Gene      | <i>P</i> score                   | 5-years<br>survival<br>high vs low |
| WNT-2     | 0.014                            | 10% vs 36%<br>(n=133 vs 43)        |
| ANGPTL4   | 0.0097                           | 20% vs 53%<br>(n=137 vs 39)        |
| Dkk-1     | 0.00013                          | 19% vs 57%<br>(n=135 vs 41)        |
| FGF basic | 0.00098                          | 9% vs 36%<br>(n=48 vs 128)         |
| MST1      | 0.00071                          | 53% vs 12%<br>(n=49 vs 127)        |
|           |                                  |                                    |

**Supplementary Table 1.** Gene Expression profile summary comparison between survival characteristics from 176 patients divided in high- and low-expressers from TCGA dataset [45,59,60].
